# Supplementary material
Source: PubMed Central journal article supplement (PMC8493396)
Supplement: ajcr0011-4175-f12.pdf [file ajcr0011-4175-f12.pdf]

# GRPEL2 promotes HCC progression

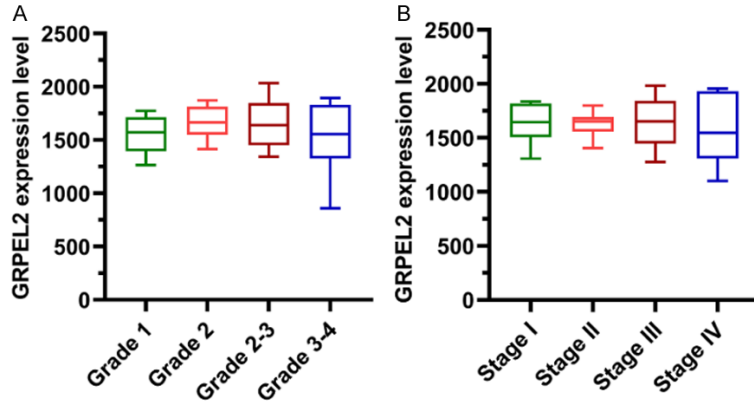

Supplementary Figure 1. A. GRPEL2 level in HCC patients classied by pathological grade. B. GRPEL2 level in HCC patients classied by TNM stage.
